# Supplementary material
Source: ML conference proceedings conference paper supplement (https://openaccess.thecvf.com/content/cvpr_2017/html/Gu_Dynamic_Facial_Analysis_2017_CVPR_paper.html)
Supplement: Supplementary file 1 [file Gu_Dynamic_Facial_Analysis_2017_CVPR_supplemental.zip]

Archive with 3 entries (3 files):
- readme.txt
- supp.pdf
- supp1.pptx
